# Supplementary material for: Image database of Japanese food samples with nutrition information
Source: PeerJ journal article supplement (doi:10.7717/peerj.9206), 2020-06-17

1

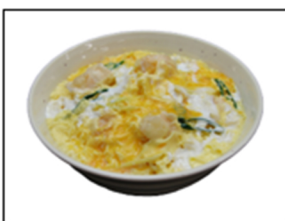

2

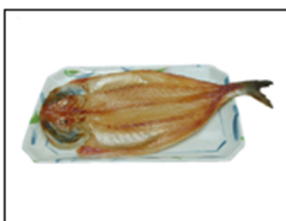

3

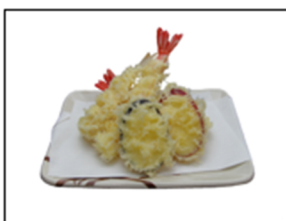

4

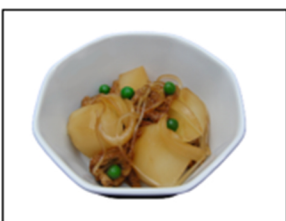

5

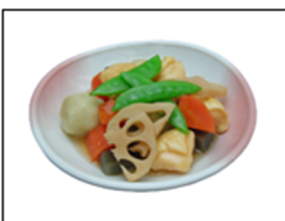

6

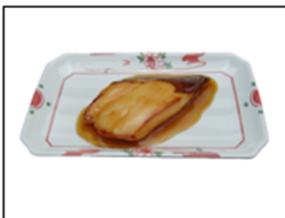

7

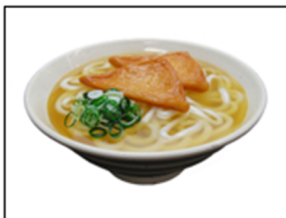

8

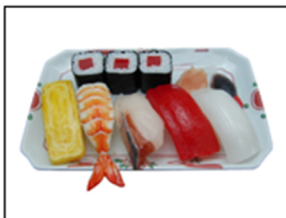

9

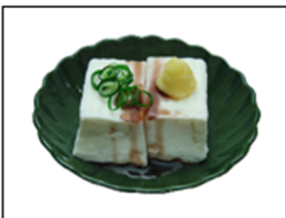

10

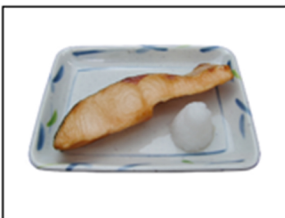

11

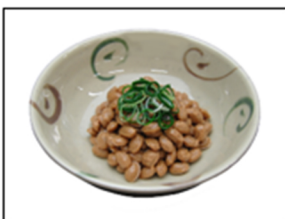

12

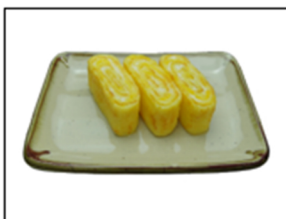

13

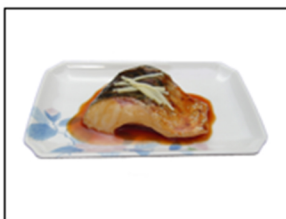

14

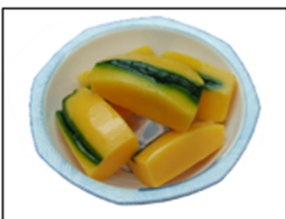

15

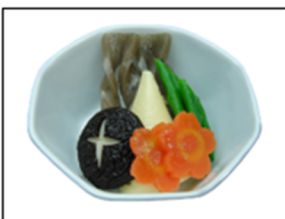

16

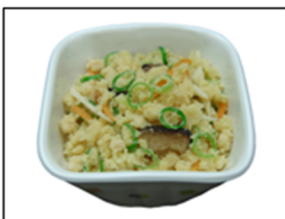

17

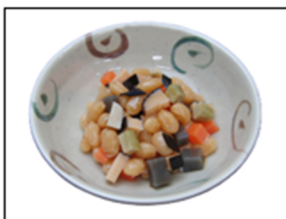

18

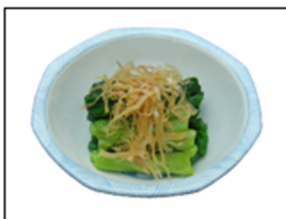

19

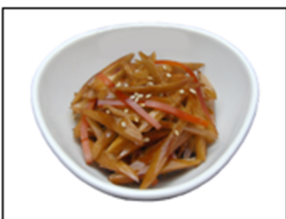

20

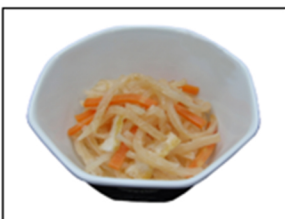

21

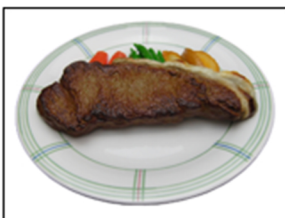

22

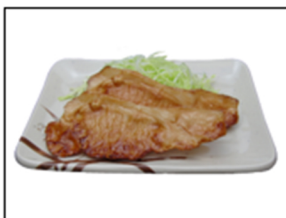

23

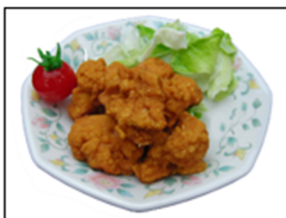

24

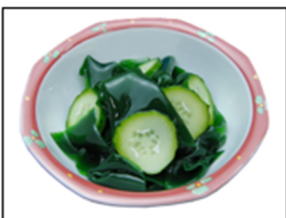

25

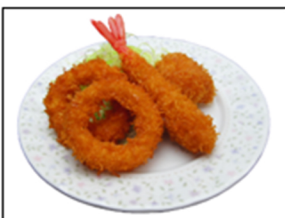

26

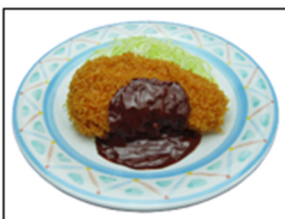

27

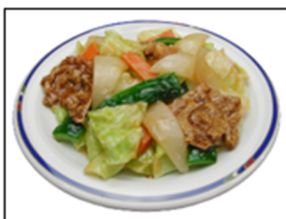

28

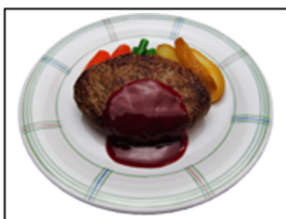

29

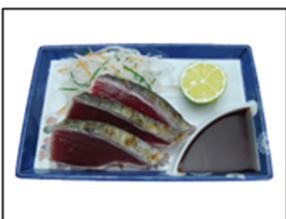

30

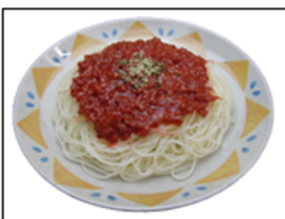

31

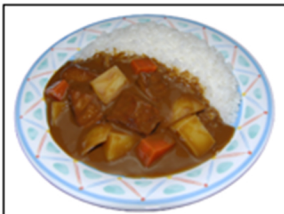

32

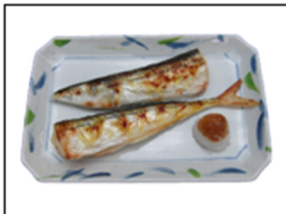

33

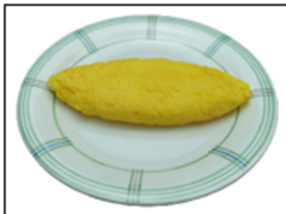

34

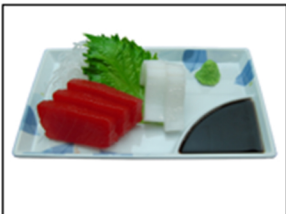

35

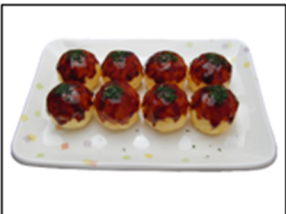

36

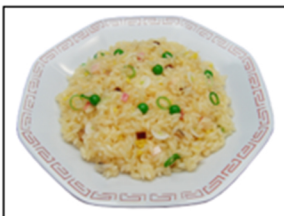

37

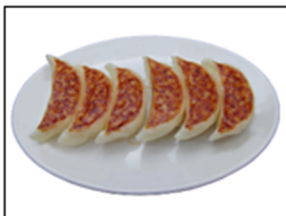

38

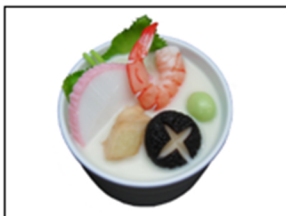

39

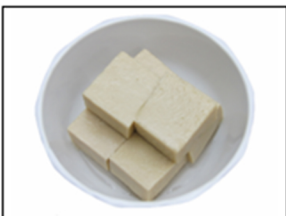

40

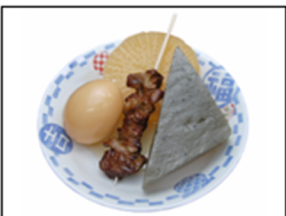

41

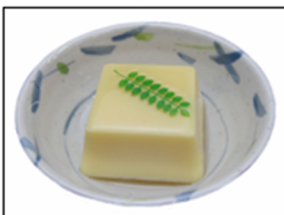

42

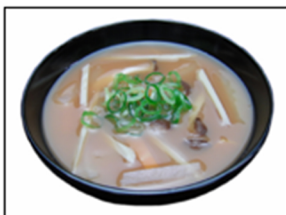

43

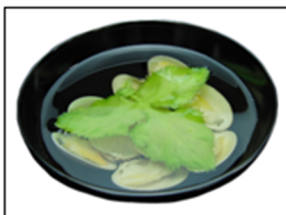

44

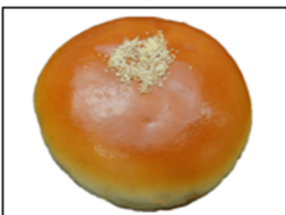

45

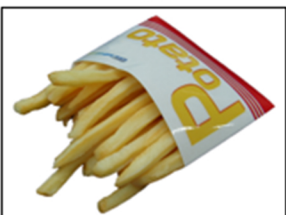

46

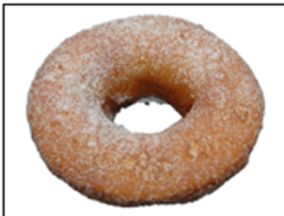

Supplement: SuppFig1_200309.pdf [file SuppFig1_200309.pdf]
