# Supplementary material for: Image database of Japanese food samples with nutrition information
Source: PeerJ journal article supplement (doi:10.7717/peerj.9206), 2020-06-17

Objective Calorie—Valence

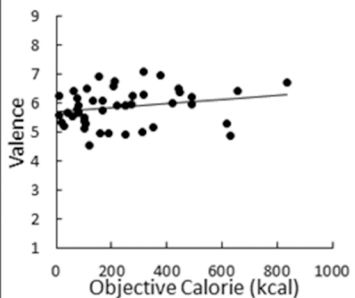

Objective Calorie—Arousal

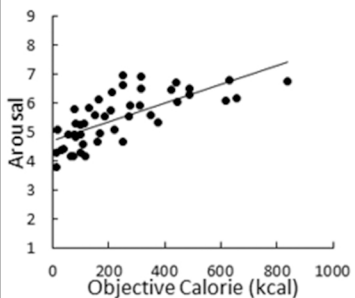

Objective Calorie—Liking

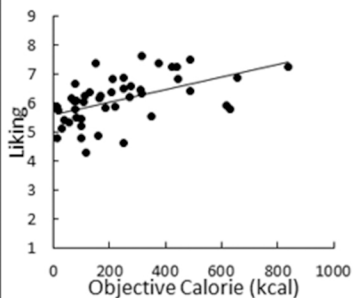

Objective Calorie—Wanting

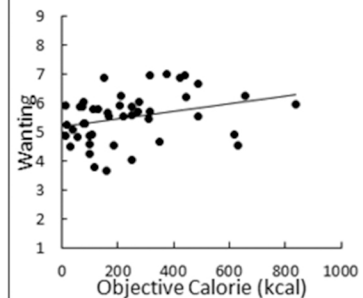

Objective Carbo—Valence

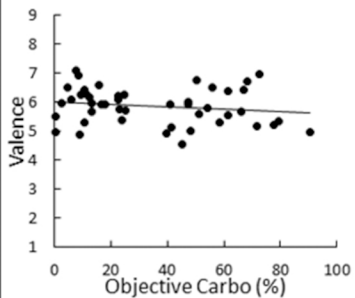

Objective Carbo—Arousal

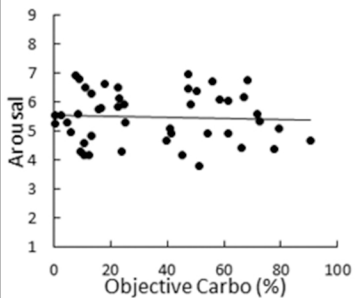

Objective Carbo—Liking

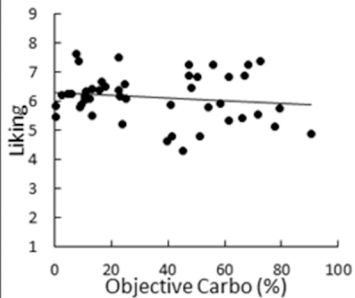

Objective Carbo—Wanting

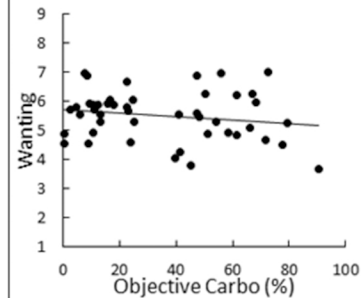

Objective Fat—Valence

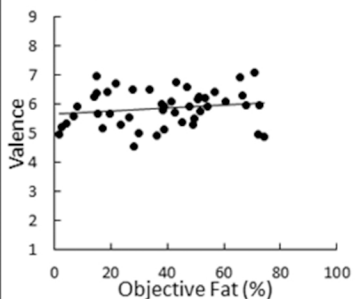

Objective Fat—Arousal

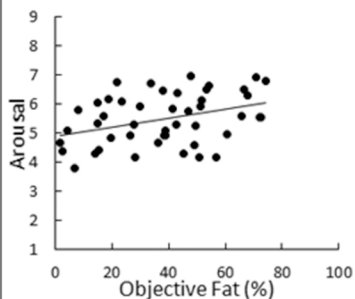

Objective Fat—Liking

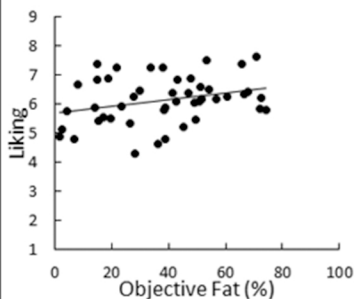

Objective Fat—Wanting

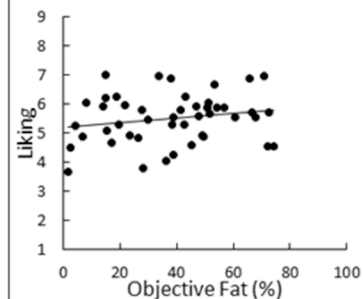

Objective Protein—Valence

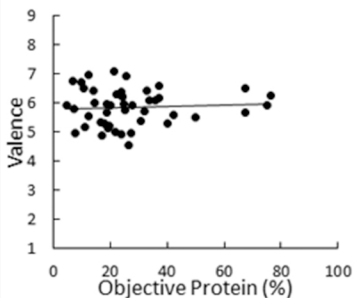

Objective Protein—Arousal

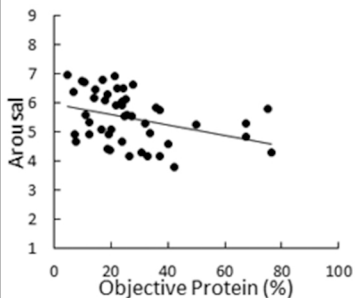

Objective Protein—Liking

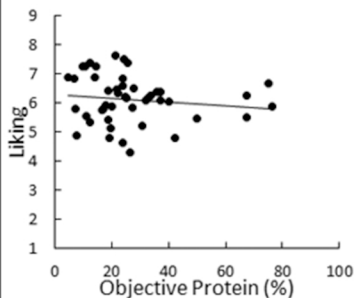

Objective Protein—Wanting

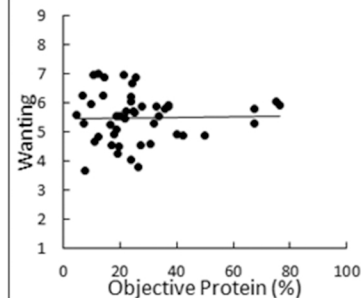

Subjective Calorie—Valence

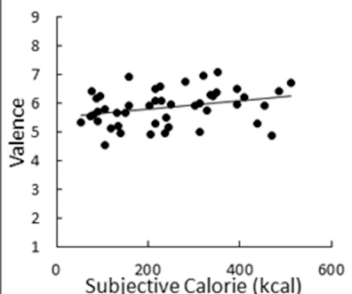

Subjective Calorie—Arousal

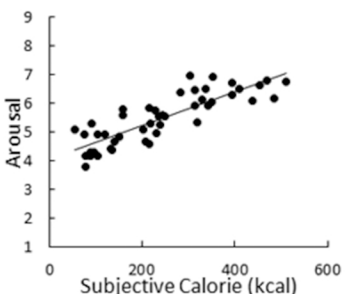

Subjective Calorie—Liking

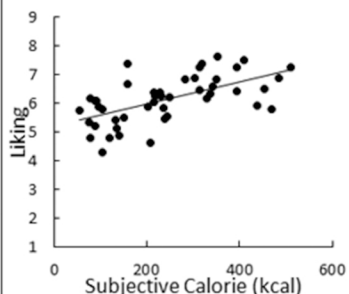

Subjective Calorie—Wanting

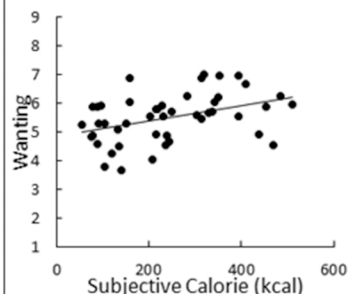

Subjective Carbo—Valence

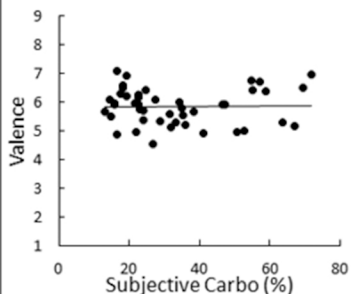

Subjective Carbo—Arousal

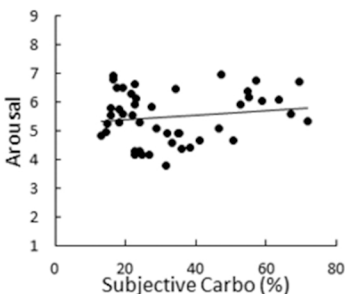

Subjective Carbo—Liking

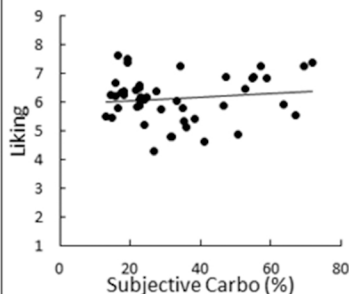

Subjective Carbo—Wanting

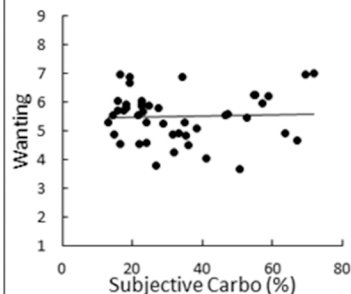

Subjective Fat—Valence

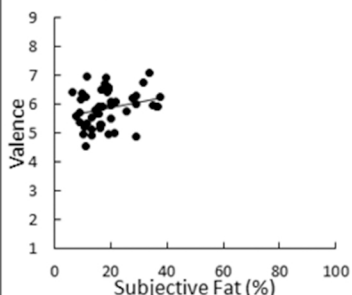

Subjective Fat—Arousal

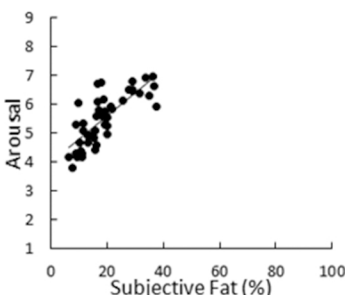

Subjective Fat—Liking

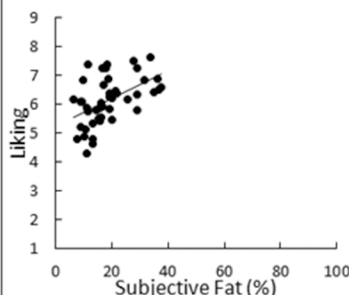

Subjective Fat—Wanting

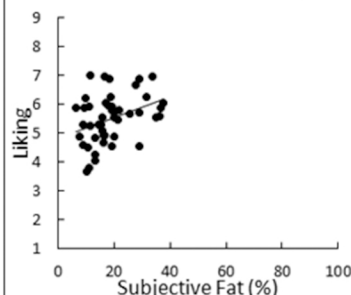

Subjective Protein—Valence

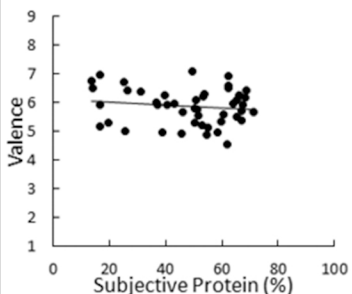

Subjective Protein—Arousal

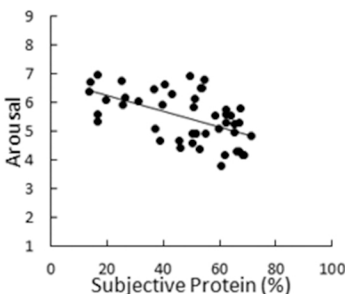

Subjective Protein—Liking

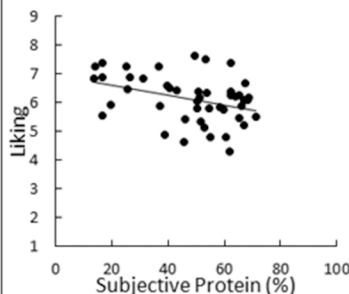

Subjective Protein—Wanting

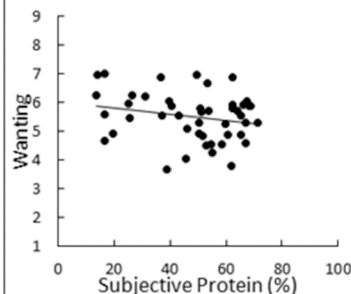

Supplement: SuppFig4_200309.pdf [file SuppFig4_200309.pdf]
