# Supplementary material for: Image database of Japanese food samples with nutrition information
Source: PeerJ journal article supplement (doi:10.7717/peerj.9206), 2020-06-17
Supplement: FileS1.pdf [file FileS1.pdf]

## Supplemental Results

### *Visual properties*

The mean (with *SD*) visual properties values across all Japanese food samples were: brightness,  $198.47 \pm 14.09$ ; spatial frequency,  $0.46 \pm 0.04$ ; entropy,  $4.85 \pm 0.72$ . Some of the correlation coefficients of these visual properties with objective nutrition information (Table 1) and with subjective appraisals reached significance (e.g., objective carbohydrate–spatial frequency; brightness–subjective calorie; Table 2). However, additional analyses confirmed that all of the above-reported significant associations between the objective nutrition information and subjective appraisals were significant even when the covariates of the correlation coefficients between visual properties and subjective appraisals were included ( $t(30) > 2.13$ ,  $p < 0.05$ ; Table 3) except that the carbohydrate–valence relationship did not reach significance ( $t(30) = 1.64$ ,  $p > 0.10$ ).

Table 1. Correlation coefficients between the objective nutrition information and visual properties of Japanese food sample images.

| Nutrition    | Statistic | Visual property |                   |         |
|--------------|-----------|-----------------|-------------------|---------|
|              |           | Brightness      | Spatial frequency | Entropy |
| Calorie      | <i>r</i>  | -0.01           | 0.19              | 0.22    |
|              | <i>p</i>  | 0.193           | 0.200             | 0.141   |
| Carbohydrate | <i>r</i>  | -0.19           | <b>0.30</b>       | 0.20    |
|              | <i>p</i>  | 0.210           | <b>0.046</b>      | 0.189   |
| Fat          | <i>r</i>  | 0.24            | -0.01             | -0.03   |
|              | <i>p</i>  | 0.111           | 0.963             | 0.869   |
| Protein      | <i>r</i>  | -0.10           | <b>-0.36</b>      | -0.18   |
|              | <i>p</i>  | 0.493           | <b>0.013</b>      | 0.241   |

Degrees of freedom were 44. Significant results ( $p < 0.05$ ) are in bold.

Table 2. Mean (with standard error) correlation coefficients and their Student's one-sample  $t$ -tests' (two-tailed) results for the relationships between visual properties and subjective appraisals for Japanese food sample images.

| Visual property   | Statistic | Subjective appraisal          |                              |                 |                 |                              |                              |                              |                               |
|-------------------|-----------|-------------------------------|------------------------------|-----------------|-----------------|------------------------------|------------------------------|------------------------------|-------------------------------|
|                   |           | Valence                       | Arousal                      | Liking          | Wanting         | Calorie                      | Carbohydrate                 | Fat                          | Protein                       |
| Brightness        | $r$       | 0.04<br>(0.02)                | 0.03<br>(0.02)               | 0.03<br>(0.02)  | 0.01<br>(0.02)  | <b>0.04</b><br><b>(0.01)</b> | -0.02<br>(0.01)              | <b>0.04</b><br><b>(0.02)</b> | -0.01<br>(0.01)               |
|                   | $t$       | 1.53                          | 1.74                         | 1.37            | 0.56            | <b>2.92</b>                  | 1.36                         | <b>2.05</b>                  | 0.73                          |
|                   | $p$       | 0.135                         | 0.000                        | 0.000           | 0.577           | <b>0.006</b>                 | 0.000                        | <b>0.048</b>                 | 0.000                         |
| Spatial frequency | $r$       | <b>-0.07</b><br><b>(0.02)</b> | 0.03<br>(0.02)               | -0.05<br>(0.03) | -0.05<br>(0.03) | <b>0.07</b><br><b>(0.01)</b> | <b>0.15</b><br><b>(0.01)</b> | -0.01<br>(0.01)              | <b>-0.14</b><br><b>(0.01)</b> |
|                   | $t$       | <b>2.51</b>                   | 1.40                         | 1.68            | 1.77            | <b>5.63</b>                  | <b>8.90</b>                  | 0.88                         | <b>7.56</b>                   |
|                   | $p$       | <b>0.017</b>                  | 0.170                        | 0.102           | 0.085           | <b>0.000</b>                 | <b>0.000</b>                 | 0.383                        | <b>0.000</b>                  |
| Entropy           | $r$       | <b>-0.05</b><br><b>(0.02)</b> | <b>0.06</b><br><b>(0.02)</b> | -0.00<br>(0.02) | -0.02<br>(0.02) | <b>0.14</b><br><b>(0.01)</b> | <b>0.04</b><br><b>(0.01)</b> | 0.03<br>(0.01)               | <b>-0.06</b><br><b>(0.01)</b> |
|                   | $t$       | <b>2.06</b>                   | <b>2.47</b>                  | 0.30            | 0.75            | <b>10.1</b>                  | <b>2.84</b>                  | 1.96                         | <b>4.27</b>                   |
|                   | $p$       | <b>0.047</b>                  | <b>0.019</b>                 | 0.765           | 0.459           | <b>0.000</b>                 | <b>0.008</b>                 | 0.058                        | <b>0.000</b>                  |

Data were analyzed after Fisher's  $r$ -to- $z$  transformation. Degrees of freedom were 31. Significant results ( $p < 0.05$ ) are in bold.

Table 3. Results of one-sample  $t$ -tests (two-tailed) for the correlation coefficients between the objective nutrition information and subjective appraisals with the covariates of correlation coefficients between visual properties and subjective appraisals.

| Nutrition    | Visual property   | Statistic | Subjective appraisal |              |              |              |              |
|--------------|-------------------|-----------|----------------------|--------------|--------------|--------------|--------------|
|              |                   |           | Valence              | Arousal      | Liking       | Wanting      | Nutrition    |
| Calorie      | Brightness        | $t$       | <b>2.31</b>          | <b>8.51</b>  | <b>5.47</b>  | <b>3.05</b>  | <b>23.53</b> |
|              |                   | $p$       | <b>0.028</b>         | <b>0.000</b> | <b>0.000</b> | <b>0.005</b> | <b>0.000</b> |
|              | Spatial frequency | $t$       | <b>3.74</b>          | <b>8.91</b>  | <b>6.04</b>  | <b>4.27</b>  | <b>17.94</b> |
|              |                   | $p$       | <b>0.001</b>         | <b>0.000</b> | <b>0.000</b> | <b>0.000</b> | <b>0.000</b> |
|              | Entropy           | $t$       | <b>3.97</b>          | <b>8.08</b>  | <b>6.14</b>  | <b>3.67</b>  | <b>11.13</b> |
|              |                   | $p$       | <b>0.000</b>         | <b>0.000</b> | <b>0.000</b> | <b>0.001</b> | <b>0.000</b> |
| Carbohydrate | Brightness        | $t$       | <b>2.28</b>          | 0.62         | <b>2.43</b>  | <b>2.56</b>  | <b>12.11</b> |
|              |                   | $p$       | <b>0.030</b>         | 0.542        | <b>0.021</b> | <b>0.016</b> | <b>0.000</b> |
|              | Spatial frequency | $t$       | 1.64                 | 1.20         | <b>2.22</b>  | 1.65         | <b>5.23</b>  |
|              |                   | $p$       | 0.111                | 0.240        | <b>0.034</b> | 0.110        | <b>0.000</b> |
|              | Entropy           | $t$       | <b>2.08</b>          | 1.19         | <b>3.03</b>  | <b>2.42</b>  | <b>10.98</b> |
|              |                   | $p$       | <b>0.046</b>         | 0.242        | <b>0.005</b> | <b>0.022</b> | <b>0.000</b> |
| Fat          | Brightness        | $t$       | <b>2.13</b>          | <b>5.10</b>  | <b>4.68</b>  | <b>3.57</b>  | <b>11.87</b> |
|              |                   | $p$       | <b>0.041</b>         | <b>0.000</b> | <b>0.000</b> | <b>0.001</b> | <b>0.000</b> |
|              | Spatial frequency | $t$       | <b>2.57</b>          | <b>5.31</b>  | <b>4.43</b>  | <b>2.77</b>  | <b>11.01</b> |
|              |                   | $p$       | <b>0.015</b>         | <b>0.000</b> | <b>0.000</b> | <b>0.010</b> | <b>0.000</b> |
|              | Entropy           | $t$       | <b>2.53</b>          | <b>4.69</b>  | <b>4.64</b>  | <b>2.85</b>  | <b>10.68</b> |
|              |                   | $p$       | <b>0.017</b>         | <b>0.000</b> | <b>0.000</b> | <b>0.008</b> | <b>0.000</b> |
| Protein      | Brightness        | $t$       | 0.48                 | <b>5.70</b>  | 1.20         | 0.06         | <b>14.68</b> |
|              |                   | $p$       | 0.638                | <b>0.000</b> | 0.240        | 0.949        | <b>0.000</b> |
|              | Spatial frequency | $t$       | 2.04                 | <b>5.97</b>  | <b>3.11</b>  | 1.81         | <b>7.58</b>  |
|              |                   | $p$       | 0.051                | <b>0.000</b> | <b>0.004</b> | 0.081        | <b>0.000</b> |
|              | Entropy           | $t$       | 0.49                 | <b>4.93</b>  | 1.62         | 0.40         | <b>11.40</b> |
|              |                   | $p$       | 0.627                | <b>0.000</b> | 0.115        | 0.690        | <b>0.000</b> |

Data were analyzed after Fisher's  $r$ -to- $z$  transformation. Degrees of freedom were 30. Subjective appraisals of nutrition show the data corresponding to objective nutrition (e.g., subjective calorie for

objective calorie). Significant results ( $p < 0.05$ ) are in bold.
