# Supplementary material for: Image database of Japanese food samples with nutrition information
Source: PeerJ journal article supplement (doi:10.7717/peerj.9206), 2020-06-17

1

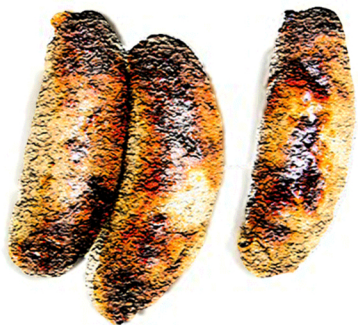

2

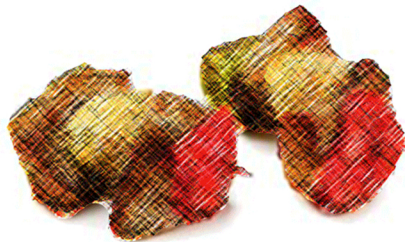

3

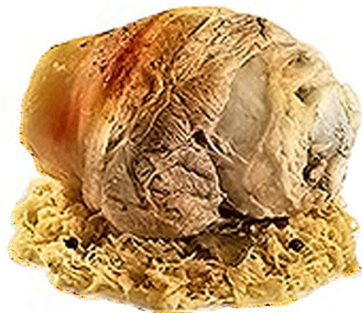

4

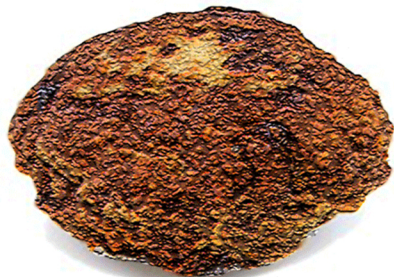

5

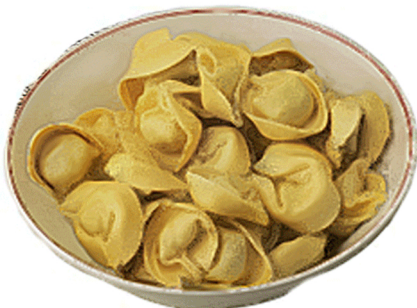

Supplement: SuppFig2_200317b.pdf [file SuppFig2_200317b.pdf]
