# Supplementary material for: Image database of Japanese food samples with nutrition information
Source: PeerJ journal article supplement (doi:10.7717/peerj.9206), 2020-06-17

Calorie

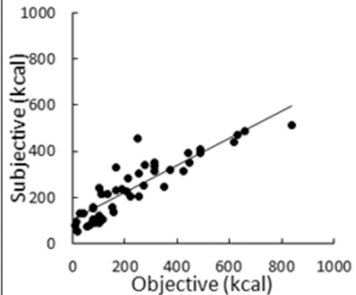

Carbo

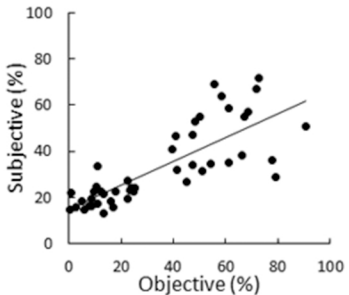

Fat

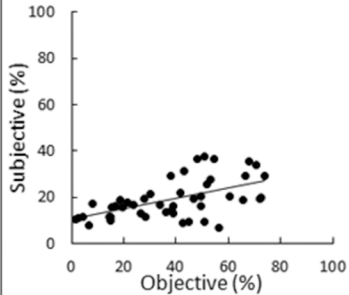

Protein

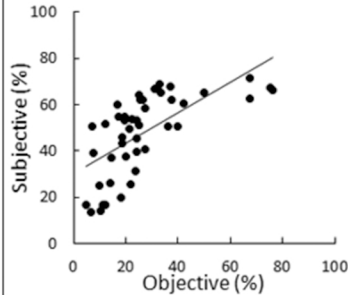

Supplement: SuppFig3_200309.pdf [file SuppFig3_200309.pdf]
